# Supplementary material for: Nonlinear relationship between aspartate aminotransferase to alanine aminotransferase ratio and the risk of prediabetes: A retrospective study based on chinese adults
Source: PubMed Central journal article supplement (PMC9640919; doi:10.3389/fendo.2022.1041616), 2022-10-25
Supplement: Table_1.pdf [file Table_1.pdf]

| <b>Variable</b>            | <b>AST/ALT ratio≤1.5</b> | <b>AST/ALT ratio &gt;1.5</b> | <b>P-value</b> |
|----------------------------|--------------------------|------------------------------|----------------|
| Participants               | 55422                    | 19782                        |                |
| Gender                     |                          |                              | <0.001         |
| Male                       | 36256 (65.42%)           | 5653 (28.58%)                |                |
| Female                     | 19166 (34.58%)           | 14129 (71.42%)               |                |
| Age(years)                 | 40.91 ± 11.59            | 40.87 ± 13.38                | 0.679          |
| Drinking status            |                          |                              |                |
| Current-smoker             | 1287 (2.32%)             | 292 (1.48%)                  |                |
| Ex-smoker                  | 9652 (17.42%)            | 1655 (8.37%)                 |                |
| Never-smoker               | 44483 (80.26%)           | 17835 (90.16%)               |                |
| Smoking status             |                          |                              | <0.001         |
| Current-smoker             | 10250 (18.49%)           | 1538 (7.77%)                 |                |
| Ex-smoker                  | 2550 (4.60%)             | 368 (1.86%)                  |                |
| Never-smoker               | 42622 (76.90%)           | 17876 (90.36%)               |                |
| Family history of diabetes |                          |                              | 0.974          |
| No                         | 54351 (98.07%)           | 19399 (98.06%)               |                |
| Yes                        | 1071 (1.93%)             | 383 (1.94%)                  |                |
| SBP (mmHg)                 | 119.43 ± 15.65           | 114.22 ± 15.96               | <0.001         |
| DBP (mmHg)                 | 74.47 ± 10.67            | 70.87 ± 10.05                | <0.001         |
| BMI (kg/m <sup>2</sup> )   | 23.63 ± 3.24             | 21.37 ± 2.65                 | <0.001         |
| HDL-C (mmol/L)             | 1.34 ± 0.29              | 1.44 ± 0.29                  | <0.001         |
| TG (mmol/L)                | 1.38 ± 1.00              | 0.95 ± 0.61                  | <0.001         |
| LDL-C (mmol/L)             | 2.72 ± 0.67              | 2.59 ± 0.65                  |                |
| TC (mmol/L)                | 4.69 ± 0.89              | 4.54 ± 0.87                  | <0.001         |
| BUN (mmol/L)               | 4.72 ± 1.18              | 4.41 ± 1.18                  | <0.001         |
| SCr (umol/L)               | 72.72 ± 15.51            | 65.56 ± 15.93                |                |
| FPG (mmol/L)               | 4.80 ± 0.48              | 4.73 ± 0.51                  | <0.001         |
